# Supplementary material
Source: Springer Nature journal article supplement (https://www.springermedizin.de/resource/supplementary/12913_2009_1144_MOESM2_ESM.pdf/9528386)
Supplement: MOESM2 [file 9528386]

# 0. PROVIDE SAFE AND EFFECTIVE COMMUNITY BASED ANTI-COAGULATION SERVICE

## 1. Enlist Patient

## 2. Monitor Patient

1. in this order  
2. may refer emergently to HBAC at any point, transfers care

this order

### 1.1 obtain patient list for CBAC

### 1.2 invite patient

### 1.3 schedule appointment

### 2.1 obtain medical history

### 2.2 obtain INR

### 2.3 determine dose and duration

### 2.4 conclude appointment

if 1.1.1 and 1.1.2 not met, stop

#### 1.1.1 ensure appropriate referral

#### 1.1.2 ensure access to complete information

#### 1.2.1 postal

#### 1.2.2 telephone

either or

if patient does not respond, stop

#### 1.3.1 document appointment

#### 1.3.2 follow-up DNA

paper

electronic

#### admin or practitioner contact patient

#### restart: 1.3

1. in order  
2. if patient DNA 2-3 times, alert GP

any order

#### 2.1.1 review checklist with pt: medications diet medical history compliance tablet inventory other

#### 2.1.2 consider targeted physical exam

#### 2.1.3 obtain recent INR and dose/duration

if coagulometer fails, determine cause, may retest

#### 2.2.1 obtain adequate blood sample

#### 2.2.2 use coagulometer to obtain INR

#### 2.2.3 enter INR into DSS

in this order

#### 2.3.1 consider DSS recommendation for dose and duration

#### 2.3.2 consider other factors which may override DSS

#### 2.3.3 consider paper based algorithm

#### 2.3.4 consider need for additional support

if DSS fails, determine cause, may return 2.2.1, use paper algorithm or seek, additional support

either or

#### 2.4.1.1 clinic appt, then to 1.3

#### 2.4.1.2 refer for annual review

#### 2.4.1.2.1 monitor patients who continue a/c

#### 2.4.1.2.2 cease monitor patients who discontinue a/c

any order

#### 2.4.2.1 document for patient

#### 2.4.2.2 document in EHR

#### 2.4.2.3 document for administrator

any order

in this order
